# Supplementary material for: Cadmium and Proliferation in Human Uterine Leiomyoma Cells: Evidence of a Role for EGFR/MAPK Pathways but Not Classical Estrogen Receptor Pathways
Source: PubMed Central journal article supplement (PMC4384203; doi:10.1289/ehp.1408234), 2014-10-24
Supplement: ehp.1408234.s001.508.pdf [file ehp.1408234.s001.508.pdf]

**Supplemental Material**

**Cadmium and Proliferation in Human Uterine Leiomyoma Cells:  
Evidence of a Role for EGFR/MAPK Pathways but Not Classical  
Estrogen Receptor Pathways**

Xiaohua Gao, Linda Yu, Alicia B. Moore, Grace E. Kissling, Michael P. Waalkes, and  
Darlene Dixon

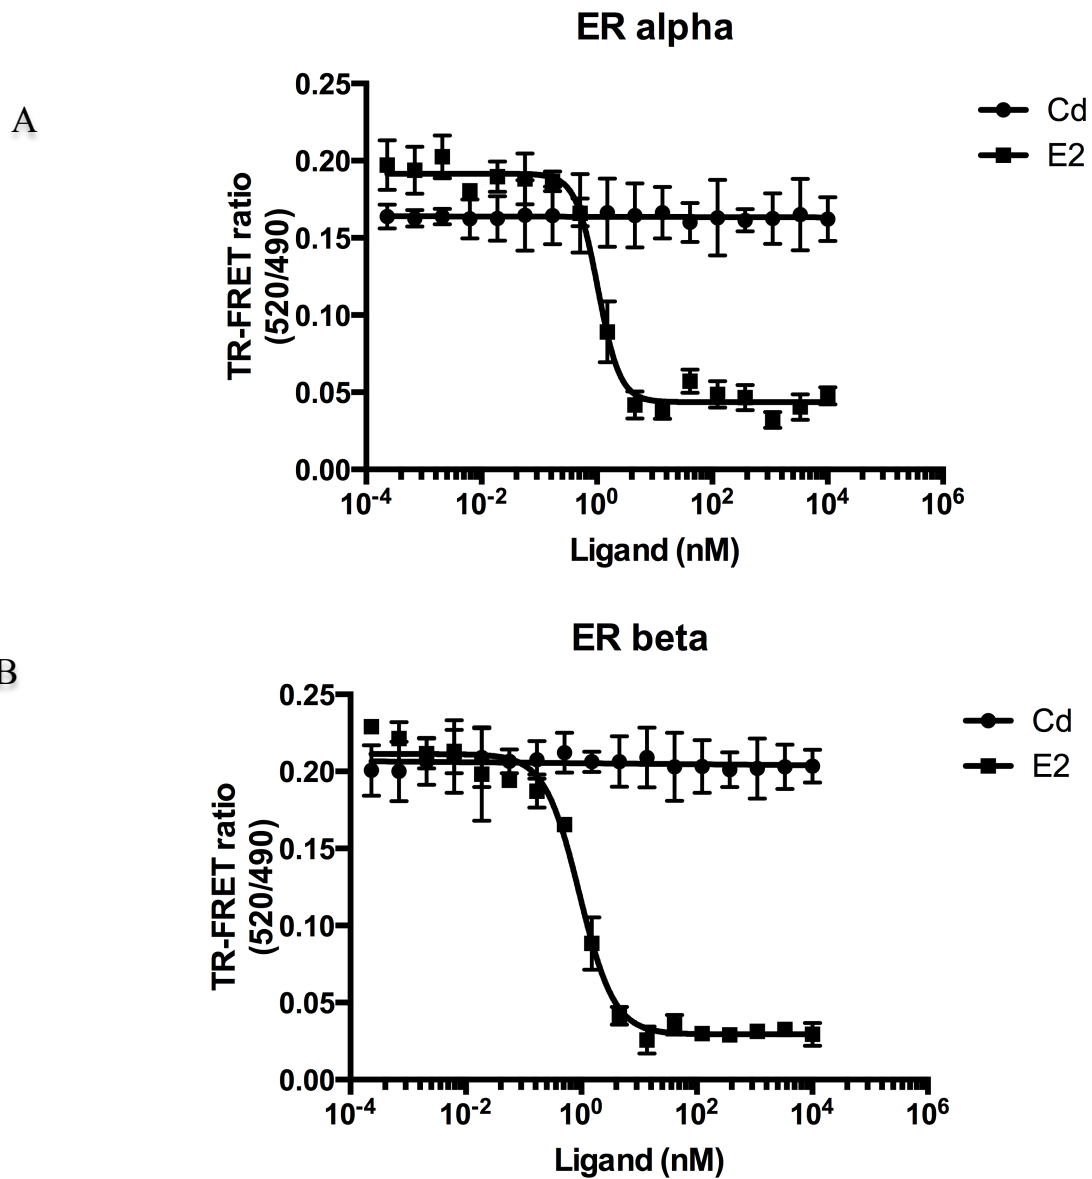

**Figure S1.** Cd does not bind to ER $\alpha$  or ER $\beta$ . After a 4 h incubation period, increasing concentrations of E<sub>2</sub> showed high binding affinity to ER $\alpha$  (A) and ER $\beta$  (B), while Cd was less likely to bind ER $\alpha$  (A) or ER $\beta$  (B).

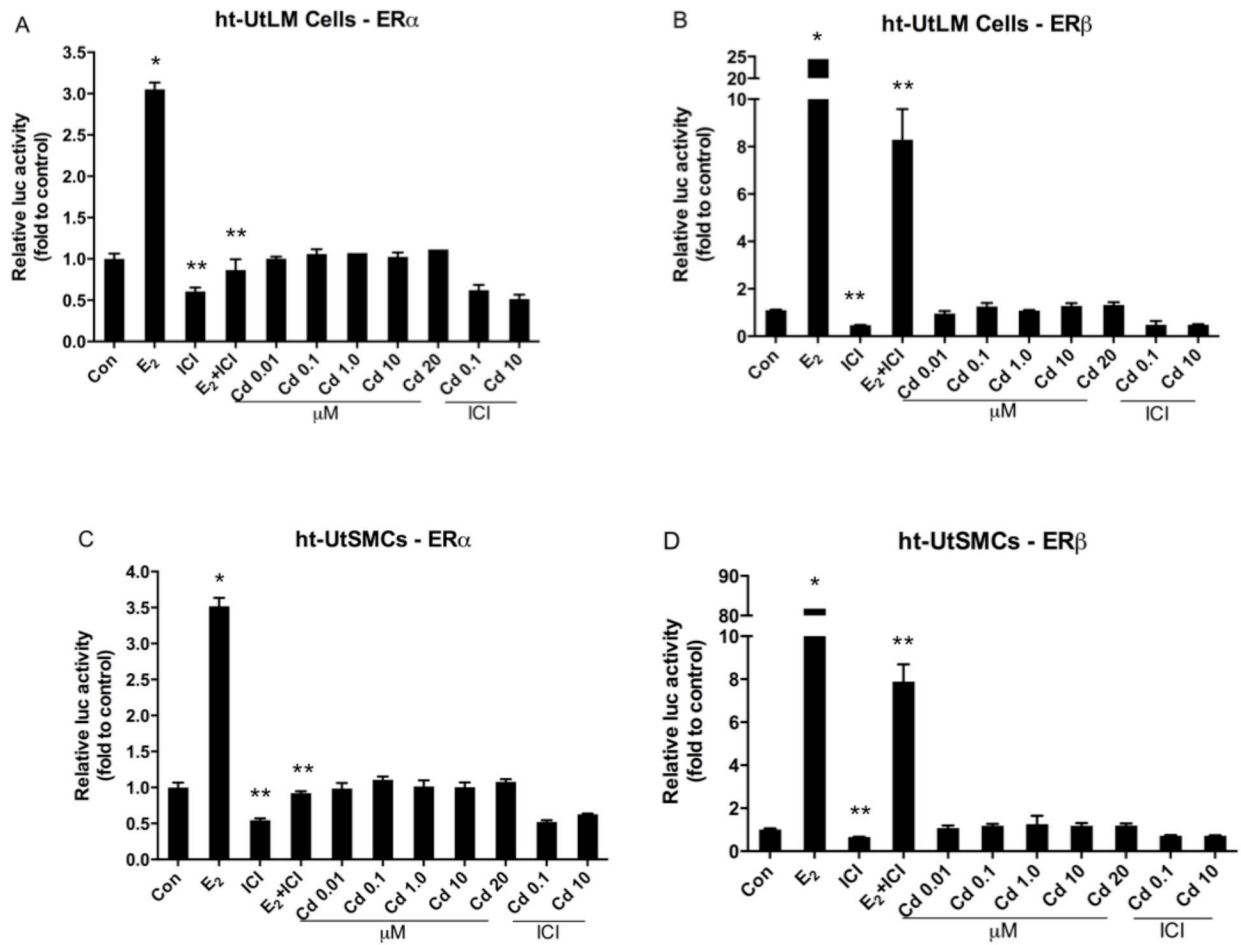

**Figure S2.** Transient transfection and luciferase assay in ht-UtLM cells and ht-UtSMCs. Relative luciferase activity in ht-UtLM cells and ht-UtSMCs transfected with hER $\alpha$  (A, C), hER $\beta$  (B, D), and 3 $\times$ -Vit-ERE-TATA-Luc plasmids that were treated with DMSO (vehicle control, Con), 10 nM E<sub>2</sub>, or 0.01, 0.1, 1.0, 10, 20  $\mu$ M of Cd in the presence or absence of 1.0  $\mu$ M ICI 182,780. \* $p$ <0.05 vs. Control=Con. \*\* $p$ <0.05 vs. E<sub>2</sub>. The experiments were repeated three times with independent cultures.

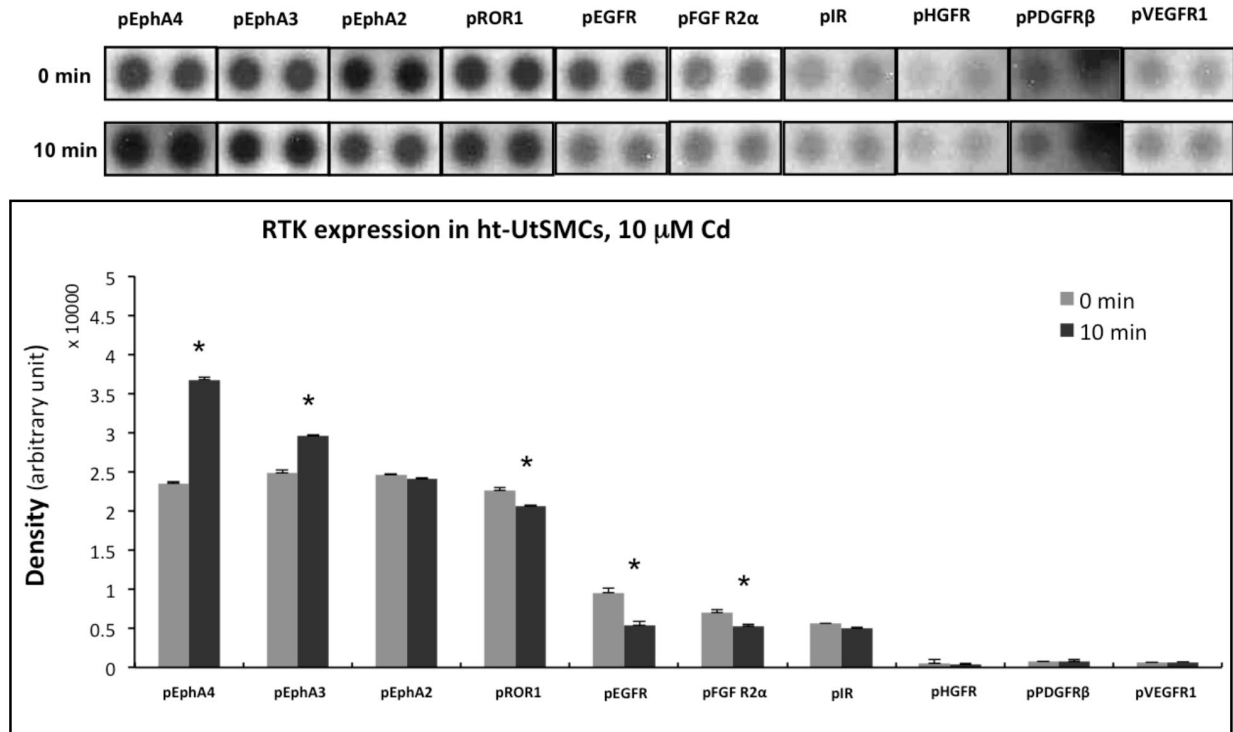

**Figure S3.** Phosphorylation (p) of growth factor Receptor Tyrosine Kinases (RTKs) in ht-SMCs. Growth factor RTKs were highly expressed after Cd (10  $\mu$ M) treatment for 10 min in ht-SMCs. The significantly upregulated RTKs were Ephrin Receptor A 4 (EphA4), and Ephrin Receptor A 3 (EphA3). ROR (ROR1), EGF Receptor (EGFR), and FGF Receptor (FGFR2 $\alpha$ ) showed significantly decreased expression. While Ephrin Receptor A 2 (EphA2), Insulin Receptor (IR), HGF Receptor (HGFR), PDGF Receptor beta (PDGFR $\beta$ ), and VEGF Receptor (VEGFR1) did not show significant changes. The array was repeated at least 3 times. The bars represent the dot blot intensity values for ht-UtSMCs. \* $p < 0.05$  vs. 0 min.
